# Supplementary material
Source: Springer Nature journal article supplement (https://www.springerprofessional.de/resource/supplementary/13688_2018_137_MOESM5_ESM.pdf/15705494)
Supplement: MOESM5 [file 15705494]

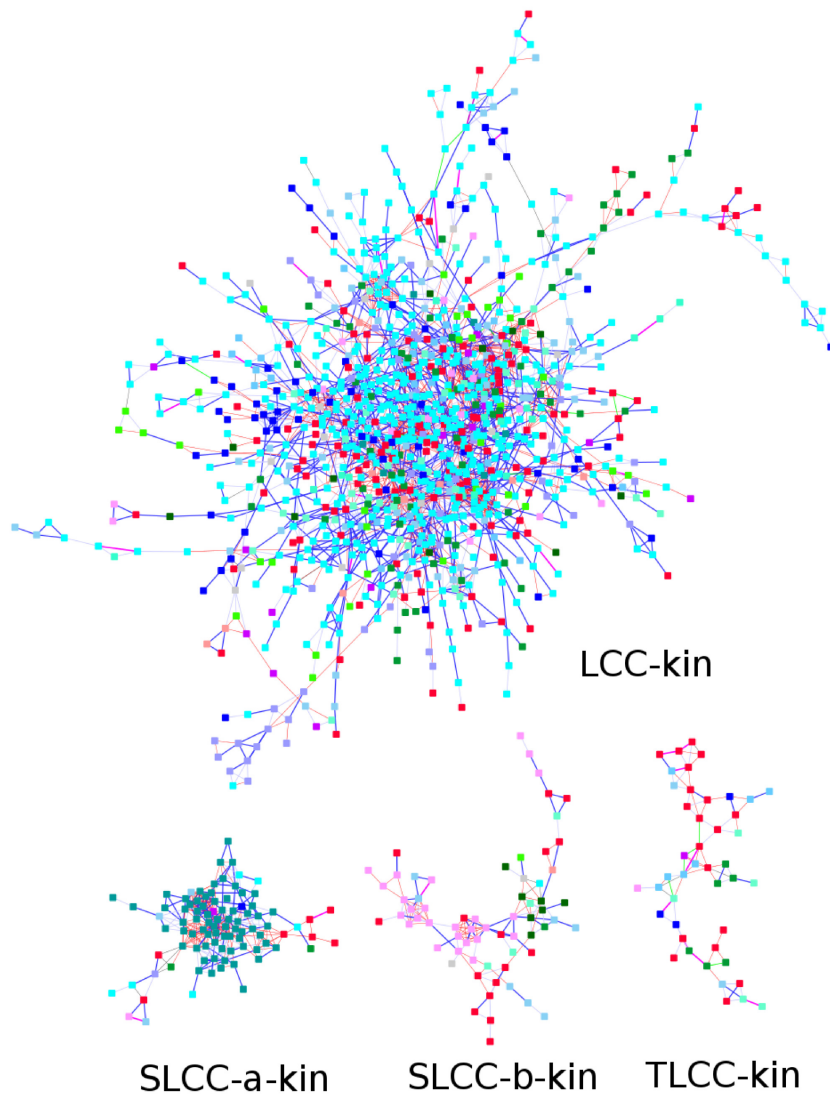

Additional file 5: The kin network derived from the four largest connected components of the network of families. The colours represent the birth region of the individuals and scheme is the same as that in the main document. The rest of the details are summarized in Table 1.
